# Supplementary material
Source: PubMed Central journal article supplement (PMC2459295)
Supplement: M802846200_1.pdf [file M802846200_1.pdf]

## Supplemental Figure Legends

**Supplemental Figure 1:** Substitution of serines at position 348 and 350 does not affect the ability of caspase-8 to process caspase-9 *in vitro*. [<sup>35</sup>S]-labeled murine caspase-9 and mutants AEPD, LDGD and LDVD proteins were incubated in the absence or presence of active human recombinant caspase-8 *in vitro*. Cleavage reactions were resolved by SDS-PAGE, and the gels fixed, dried and autoradiographed.

**Supplemental Figure 2:** Autoprocessing of murine Caspase-9 is not affected by CK2 phosphorylation. A. Western blot of cold *in vitro* translated caspase-9 incubated with or without CK2 in kinase buffer (details in Materials and Methods) probed with polyclonal phosphoserine-specific antibodies (top panel), stripped and reprobed with a monoclonal caspase-9 antibody. B. Caspase-9 (5 $\mu$ l from 25 $\mu$ l of the cold kinase reaction) were incubated alone, with 50 $\mu$ g caspase-9 +/- cytosolic S100 extract (2), or with extract, plus 1mM ATP and 0.2 $\mu$ g cyt c in Buffer A (details in Materials and Methods) in a total volume of 35 $\mu$ l. Reactions were carried out for 1 hour at 30 $^{\circ}$  C. Attenuated reactions were resolved by SDS/PAGE and western blotted using anti-caspase-9 antibody (Stressgen).

**Supplemental Figure 3.** Cells were exposed to 1  $\mu$ M okadaic acid or DMSO for 30 minutes prior to TNF addition and cell death was determined by flow cytometric analysis of Annexin V and propidium iodide uptake at the indicated times.

**Supplemental Figure 4:** A. Purified recombinant CK2 phosphorylates murine but not human caspase-9 *in vitro*. *In vitro* translated mC-9 protein was immunoprecipitated with anti-caspase-9 antibody and incubated in kinase buffer in the presence or absence of purified CK2 (top panel). Auto-phosphorylation of the CK2 b-subunit is evident in both lanes. Lower panel shows IP/western of cold *in vitro* translated murine and human caspase-9 proteins. B. Alignment of mouse, rat, dog and human residues in the vicinity of the CK2 consensus motif (underlined). The absence of a negatively charged (acidic) residue at the putative +1 position makes the human sequence a poor CK2 substrate.

# Supplemental Figure 1

| mC-9 or mutant | mC-9 |   | AEPD |   | LDGD |   | LDVD |   |
|----------------|------|---|------|---|------|---|------|---|
| active casp-8  | -    | + | -    | + | -    | + | -    | + |

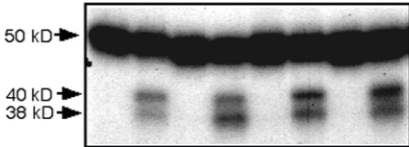

# Supplemental Figure 2

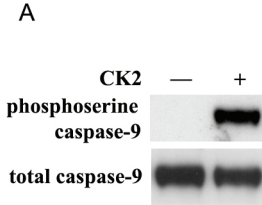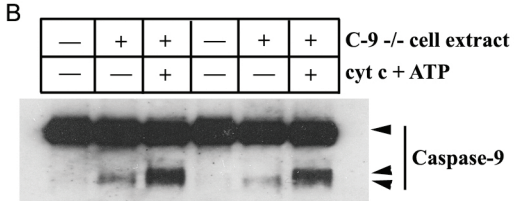

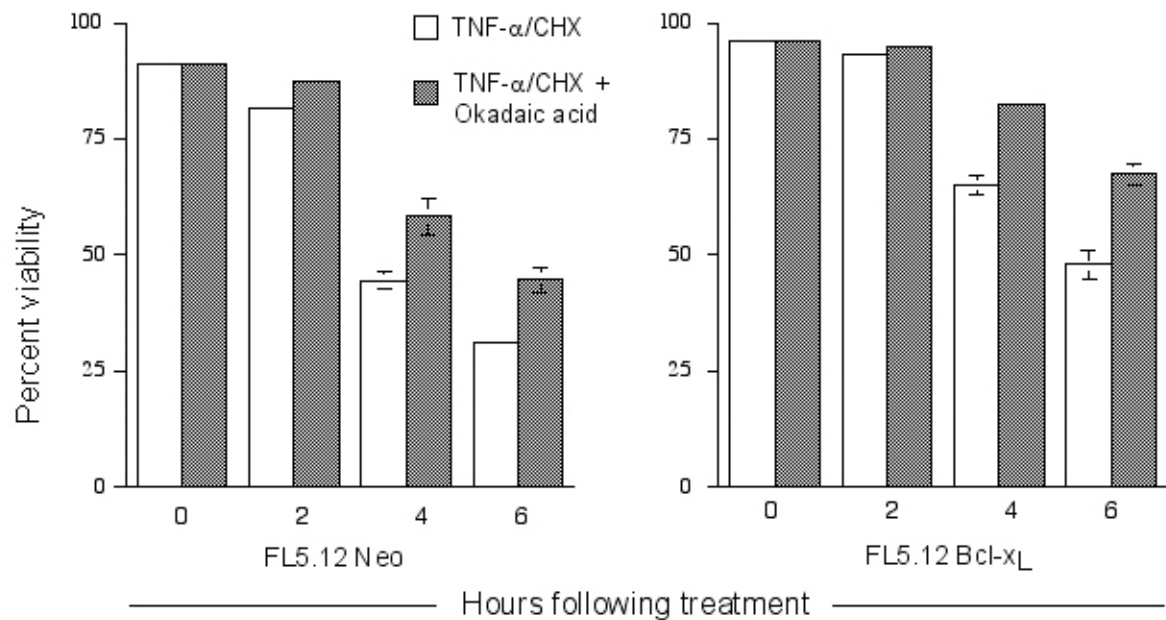

**A**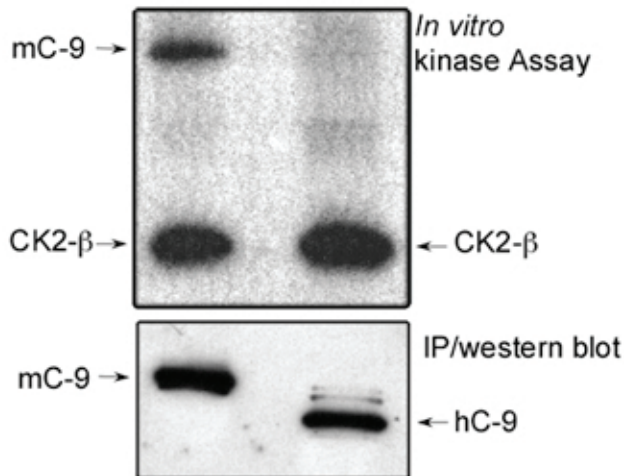**B**

|        |                                                |       |
|--------|------------------------------------------------|-------|
| AA 340 | S S Q G R <u>T L D S D S E</u> P D A V P Y Q E | mouse |
| AA 340 | S S Q D K <u>A F D S D S E</u> P D A V P Y Q E | rat   |
| AA 332 | S P E D R <u>S P G S D S E</u> P D A V P F Q E | dog   |
| AA 302 | S P E D E <u>S P G S N P E</u> P D A T P F Q E | human |
